# Supplementary material for: Association of impaired fasting glucose and Type 2 Diabetes Mellitus with brain volume changes in Alzheimer’s Disease patients analyzed by MRI: a retrospective study
Source: PeerJ. 2020 Aug 27;8:e9801. doi: 10.7717/peerj.9801 (PMC7456526; doi:10.7717/peerj.9801)
Supplement: Supplemental Information 1 — NFG= Normal fasting glucose, IFG= Impaired Fasting Glucose, T2DM= Type 2 Diabetes mellitus, SBP= systolic pressure, DBP= diastolic pressure [file peerj-08-9801-s001.xlsx]

## Sheet: Sheet1
subject	group	group	Education years	gender	Age	MMSE	FG,mmol/L	Total cholesterol,mmol/L	Triglyceride,mmol/L	SBP	DBP
1	AD_T2DM	1	0	F	86	15	11.6	5.42	1.26	140	80
2		1	12	F	62	20	5.05	4.8	1.59	140	80
3		1	9	M	76	14	11.96	6.81	0.81	130	80
4		1	12	M	64	14	8.02	4.93	1.19	130	80
5		1	5.5	F	73	20	5.46	5.04	1.31	150	70
6		1	16	M	76	25	6.41	4.58	1.21	140	90
7		1	5.5	F	84	20	5.59	4.36	0.96	140	90
8		1	16	M	72	14	7.64	4.34	1.09	110	70
9		1	5.5	F	78	13	7.03	4.33	1.05	130	80
10		1	12	F	68	15	7.36	6.57	1.15	140	80
11		1	9	F	78	25	5.74	6.1	1.76	140	80
12		1	9	F	67	8	9.54	4.73	1.78	160	100
13		1	5.5	F	77	0	5.46	3.02	0.75	120	80
14		1	16	F	73	6	8.28	5.44	1.13	130	80
15		1	15	M	74	23	17.57	5.14	1.17	110	80
16		1	5.5	F	75	25	7.27	4.65	0.64	110	80
17		1	12	M	70	23	10.36	4.09	1.06	150	90
18		1	5.5	F	75	10	17.46	6.77	2	120	80
19		1	9	F	77	15	6.57	5.33	1.33	130	70
20		1	15	F	73	9	14.59	4.09	0.76	150	80
21		1	15	F	70	22	5.73	5.5	1.21	100	65
22		1	5.5	F	81	12	8.72	5.7	0.86	140	90
23		1	12	M	67	22	7.13	5.3	1.11	110	70
24		1	9	M	70	0	13.65	6.94	1.32	130	90
25		1	15	F	68	0	5.89	4.48	0.84	120	80
26	AD_IFG	2	16	F	84	14	6.01	4.51	1.03	100	60
27		2	5.5	F	83	5	6.11	6.49	1.42	150	90
28		2	5.5	F	75	14	5.65	5.04	2.19	130	80
29		2	5.5	M	83	22	6.18	4.24	1.08	110	70
30		2	12	M	71	17	5.94	4.94	0.98	130	80
31		2	9	M	84	17	5.8	3.78	0.87	150	90
32		2	5.5	F	72	19	5.69	5.77	1.95	120	80
33		2	12	M	59	15	5.72	3.93	1.54	140	80
34		2	9	F	57	10	6.23	4.08	0.95	140	90
35		2	5.5	F	79	13	6.03	5.2	1.03	160	100
36		2	16	M	70	20	5.62	4.46	0.77	150	100
37		2	9	F	60	9	5.82	5.22	1.13	140	100
38		2	16	M	78	16	5.68	5.1	1.7	130	80
39		2	12	M	82	14	5.66	5.13	1.11	160	90
40		2	12	F	77	26	5.76	5.12	1.4	150	100
41	AD_NFG	3	16	M	85	14	5.38	4.17	1.61	120	70
42		3	5.5	F	78	22	5.17	3.9	0.67	100	60
43		3	5.5	F	73	14	5.11	7.13	1.86	150	90
44		3	12	M	76	20	4.55	4.42	0.69	160	90
45		3	9	F	74	26	4.78	5.2	1.16	110	80
46		3	5.5	F	66	0	5.38	6.59	1.77	120	80
47		3	15	F	59	10	5.26	5.28	2	120	80
48		3	12	F	76	20	5.11	6.47	1.51	160	90
49		3	16	M	89	14	5.01	3.47	0.62	150	80
50		3	5.5	F	62	3	5.34	4.65	1.26	130	80
51		3	12	F	77	10	4.74	6.23	0.86	120	80
52		3	9	M	74	18	4.96	5.48	2.21	120	90
53		3	15	M	75	15	5.3	4.77	0.56	120	70
54		3	5.5	F	80	23	4.99	4.27	1	130	80
55		3	9	M	70	19	5.11	4.63	1.72	150	90
56		3	5.5	M	63	13	5.17	3.18	1.83	160	100
57		3	9	M	65	14	4.39	3.67	1.3	120	70
58		3	15	F	69	7	4.42	5.88	1	110	80
59		3	12	M	56	15	5.15	6.21	1.03	110	80
60		3	9	F	52	15	4.79	4.33	0.53	110	80
61		3	9	F	69	24	4.81	5.07	0.93	110	70
62		3	15	M	73	0	4.19	5.21	1.16	140	80
63		3	5.5	F	75	23	5.31	4.93	0.99	160	90
64		3	5.5	F	82	13	5.56	4.68	1.15	130	80
65		3	12	M	71	25	4.35	5.2	1.55	120	70
66		3	12	F	83	14	4.98	5.17	1.17	130	80
67		3	9	F	74	27	5.59	4.42	2.09	130	80
68		3	12	F	72	21	4.67	8.38	1.03	110	70
69		3	5.5	F	63	5	5.53	6.12	1.08	140	80
70		3	15	M	74	15	5.14	2.98	1.04	140	90
71		3	5.5	F	81	14	5.28	6.13	1.79	140	85
72		3	5.5	F	78	12	4.73	5.85	2.08	140	80
73		3	15	M	72	12	4.51	3.39	0.75	140	80
74		3	0	F	80	12	4.63	5.15	0.87	140	90
75		3	16	F	74	12	5.33	6.17	1.33	140	90
76		3	0	F	56	14	4.54	6.59	0.58	120	80
77		3	9	F	63	22	4.68	5.37	0.62	110	70
78		3	12	F	54	16	4.7	4.88	0.6	110	80
79		3	12	F	73	10	4.82	6.25	0.5	110	70
80		3	16	M	67	0	4.84	5.29	0.54	150	90
81		3	9	M	70	19	5.05	5.02	0.99	140	80
82		3	9	M	76	0	4.91	3.4	0.78	125	70
83		3	5.5	F	81	21	4.78	5.95	0.65	110	80
84		3	0	F	79	12	5.59	5.29	1.3	125	80
85		3	12	F	74	0	4.85	5.8	1.29	130	80
