# Supplementary material for: Association of impaired fasting glucose and Type 2 Diabetes Mellitus with brain volume changes in Alzheimer’s Disease patients analyzed by MRI: a retrospective study
Source: PeerJ. 2020 Aug 27;8:e9801. doi: 10.7717/peerj.9801 (PMC7456526; doi:10.7717/peerj.9801)
Supplement: Supplemental Information 2 — Based on the segmentation results, atrophy of cerebral lobes was computed as its atrophic volume of cerebrospinal fluid, which was expressed as a percentage of total brain parenchymal volume. Volume from every other cerebral region was calculated as the percentage of its absolute volume by the total intracranial volume (ICV), where ICV was used to estimate the whole brain volume and correct the inter-subject head size variability. [file peerj-08-9801-s002.xlsx]

## Sheet: AllData
subject	group	White Matter Hyperintensity (Relative Volume)	ICV (Absolute Volume)	Midbrain (Relative Volume)	Pons (Relative Volume)	Medulla (Relative Volume)	SCP (Relative Volume)	Cerebellum (Relative Volume)	Hippocampus (L) (Relative Volume)	Hippocampus (R) (Relative Volume)	Amygdala (L) (Relative Volume)	Amygdala (R) (Relative Volume)	VentralDC (L) (Relative Volume)	VentralDC (R) (Relative Volume)	Thalamus-Proper (L) (Relative Volume)	Thalamus-Proper (R) (Relative Volume)	Caudate (L) (Relative Volume)	Caudate (R) (Relative Volume)	Putamen (L) (Relative Volume)	Putamen (R) (Relative Volume)	Pallidum (L) (Relative Volume)	Pallidum (R) (Relative Volume)	Accumbens-area (L) (Relative Volume)	Accumbens-area (R) (Relative Volume)	Frontal Lobe (L) (Relative Volume)	Frontal Lobe (R) (Relative Volume)	Occipital Lobe (L) (Relative Volume)	Occipital Lobe (R) (Relative Volume)	Temporal Lobe (L) (Relative Volume)	Temporal Lobe (R) (Relative Volume)	Parietal Lobe (L) (Relative Volume)	Parietal Lobe (R) (Relative Volume)	Cingulate Lobe (L) (Relative Volume)	Cingulate Lobe (R) (Relative Volume)	Insular (L) (Relative Volume)	Insular (R) (Relative Volume)
1	AD_T2DM	0.406	1348.81	0.354	0.861	0.248	0.0116	8.05	0.171	0.174	0.0795	0.0898	0.115	0.123	0.433	0.399	0.185	0.209	0.315	0.283	0.0821	0.0766	0.0221	0.0228	48.9	46.3	14.9	12.8	25	19.9	54.7	45.2	17.8	23.3	40.8	27.4
2		3.55	1353.13	0.358	0.979	0.275	0.0103	10.3	0.244	0.243	0.102	0.136	0.138	0.158	0.491	0.447	0.277	0.308	0.409	0.434	0.0947	0.099	0.0264	0.0303	32	29.7	18.3	15.5	22.8	15.4	42.2	34.3	13.6	19.7	18.9	10.9
3		1.17	1584.68	0.386	1.01	0.258	0.0104	8.55	0.156	0.178	0.081	0.0995	0.133	0.151	0.419	0.407	0.19	0.23	0.318	0.301	0.1	0.0974	0.0213	0.0231	41	41.4	14.3	10.2	28.8	21.9	39.3	36.5	12.9	15.2	35.3	19.4
4		0.512	1514.99	0.368	0.776	0.244	0.0109	9.11	0.179	0.197	0.0875	0.0989	0.131	0.148	0.401	0.4	0.199	0.232	0.297	0.309	0.092	0.0805	0.0229	0.0269	75.3	70	22.3	13.6	49.5	32.6	61.8	56.2	27.5	36.1	68.9	36.6
5		3.76	1364.85	0.348	0.701	0.237	0.0153	7.68	0.251	0.265	0.13	0.148	0.131	0.135	0.472	0.392	0.302	0.341	0.381	0.335	0.108	0.105	0.0241	0.0237	38.1	41.9	22.8	17.4	37.8	28.6	34.7	35.2	18.1	24.8	57.6	36.8
6		0.312	1467.12	0.369	0.985	0.288	0.0112	8.57	0.176	0.217	0.0952	0.133	0.128	0.138	0.437	0.397	0.191	0.222	0.287	0.269	0.0831	0.0933	0.0196	0.0233	43.9	42	23.2	17.1	32.4	27.7	47.8	40.1	22	35.3	39.8	22.8
7		2.66	1275.15	0.29	0.558	0.206	0.0097	8.94	0.2	0.219	0.101	0.0928	0.112	0.11	0.381	0.353	0.238	0.266	0.375	0.324	0.0934	0.0876	0.0184	0.0181	47.1	49.8	35.2	25.2	44.4	38.7	47.8	49.1	17.9	31.2	59.1	38
8		2.1	1548.38	0.36	0.856	0.261	0.0102	9.33	0.198	0.221	0.0728	0.0927	0.118	0.14	0.418	0.41	0.198	0.256	0.24	0.32	0.0704	0.083	0.0177	0.024	58.8	38.8	21.1	17.3	84.7	42	47.7	33.5	23.4	32.2	179	44.9
9		1.44	1390.86	0.352	0.915	0.256	0.0121	8.85	0.172	0.214	0.0821	0.11	0.12	0.123	0.42	0.31	0.183	0.196	0.297	0.267	0.098	0.0976	0.022	0.0212	51.8	50.6	16.5	13.2	29.7	18.9	43.3	36.1	11.3	21.1	37.6	14.6
10		0.423	1461.85	0.36	0.858	0.255	0.00929	9.14	0.192	0.229	0.12	0.151	0.131	0.142	0.426	0.391	0.229	0.253	0.325	0.309	0.0976	0.0947	0.029	0.0305	38.5	39.4	18.2	14.6	29.3	27.9	48.4	49.9	13.3	24	31.8	19.8
11		1.08	1430.87	0.39	0.914	0.252	0.0119	9.13	0.258	0.264	0.111	0.139	0.127	0.138	0.418	0.412	0.194	0.245	0.349	0.332	0.111	0.105	0.0245	0.0302	47.8	42	21.9	16.2	26.1	19.1	50.4	43.7	20.2	23.4	47.1	24.9
12		0.742	1142.96	0.36	0.824	0.267	0.01	10.2	0.151	0.174	0.0693	0.0767	0.124	0.136	0.468	0.399	0.2	0.236	0.311	0.296	0.0876	0.0811	0.0188	0.024	42.3	39.5	15.1	15.3	38.6	31.7	40.6	35.3	9.01	14.2	42.6	23.9
13		0.989	1167.06	0.392	0.96	0.276	0.0113	10.2	0.255	0.292	0.0983	0.108	0.146	0.159	0.449	0.394	0.176	0.218	0.281	0.281	0.106	0.0959	0.0199	0.0199	63.7	58.9	19.8	18.3	59.3	37.5	62.4	55.7	21.8	39.7	84.3	50.5
14		0.582	1411.93	0.342	0.766	0.245	0.0103	8.15	0.224	0.2	0.111	0.128	0.127	0.13	0.417	0.364	0.19	0.193	0.346	0.271	0.0784	0.071	0.0198	0.0223	59.4	69.6	17.4	19.6	33.6	32.5	51.3	60.2	23.5	42.7	50.5	35.3
15		0.492	1319.18	0.382	0.822	0.241	0.012	8.43	0.251	0.253	0.111	0.139	0.125	0.144	0.374	0.426	0.205	0.181	0.35	0.333	0.0993	0.102	0.0256	0.017	44.8	40.7	19	17.3	31.1	24.3	43	39.2	15.7	25.5	41.7	24.8
16		0.503	1466.18	0.331	0.852	0.229	0.0115	8.05	0.214	0.207	0.106	0.123	0.13	0.137	0.436	0.415	0.218	0.253	0.323	0.321	0.0918	0.0808	0.023	0.0281	48.6	44.1	15.6	11.2	25.5	17.5	57.5	50.7	15.3	21.6	35.2	18
17		0.41	1443.35	0.357	0.884	0.24	0.00886	8.59	0.23	0.239	0.12	0.134	0.134	0.151	0.457	0.444	0.204	0.221	0.29	0.279	0.107	0.0892	0.0224	0.0232	39.6	36.7	13.5	10.6	22.1	18.3	37.7	34.6	15.1	21.9	39.3	18.7
18		0.81	1292.49	0.35	0.612	0.237	0.0102	8.64	0.223	0.255	0.102	0.128	0.129	0.145	0.423	0.38	0.218	0.245	0.349	0.305	0.0805	0.0774	0.0208	0.0228	41.8	41.7	25.2	16.2	36.4	27.3	42.4	36.1	12.8	16.8	33.7	27.4
19		0.862	1348.34	0.361	0.839	0.255	0.0128	8.58	0.222	0.22	0.112	0.123	0.123	0.139	0.379	0.367	0.19	0.215	0.292	0.273	0.0829	0.0784	0.0246	0.0237	41.2	44.8	21	16.6	23.4	19.6	51.4	49.4	16.5	25.5	28.1	18.3
20		0.549	1443.21	0.364	0.872	0.253	0.011	8.82	0.174	0.184	0.074	0.0863	0.119	0.136	0.444	0.383	0.194	0.18	0.347	0.319	0.108	0.0973	0.0231	0.0228	48.4	54.3	24.7	25.7	28.8	37.4	59.8	62.3	25.4	42.4	57.8	53
21		2.17	1305.52	0.371	0.838	0.238	0.0115	8.32	0.198	0.196	0.08	0.0828	0.136	0.149	0.477	0.44	0.242	0.274	0.379	0.345	0.096	0.0922	0.026	0.0253	39.5	38.9	19.8	16	28.5	29	45.9	39.4	14.1	23.1	31.5	24.8
22		0.766	1501.19	0.346	0.9	0.249	0.0107	8.65	0.227	0.216	0.114	0.11	0.115	0.123	0.397	0.398	0.205	0.244	0.322	0.304	0.0869	0.0967	0.0231	0.0256	35.1	40.1	17.3	11.3	23.9	27.9	32	41.1	11	15.6	30.9	32.3
23		0.439	1423.3	0.385	0.941	0.277	0.014	9.66	0.18	0.19	0.0952	0.119	0.141	0.151	0.445	0.399	0.191	0.205	0.327	0.328	0.0991	0.0858	0.023	0.0273	45.1	40.4	18.4	19	28.1	25	37.2	35.7	19.1	22.5	42.1	23.9
24		1.4	1625.46	0.367	0.847	0.248	0.0117	7.72	0.22	0.242	0.124	0.139	0.135	0.146	0.418	0.398	0.218	0.256	0.287	0.274	0.0939	0.0834	0.0176	0.0203	29	25.3	11	9.57	42.6	27.4	20.6	21.5	5.34	10.4	75.7	31.6
25		0.241	1339.16	0.4	0.88	0.279	0.0104	9.19	0.233	0.279	0.124	0.162	0.15	0.163	0.511	0.48	0.188	0.191	0.334	0.333	0.0944	0.085	0.0278	0.028	33.4	29.4	12.5	10	19.6	14.9	32	27.8	9.27	16.7	23.8	12.5
26	AD_IFG	0.537	1380.6	0.383	1.05	0.273	0.0111	9.79	0.166	0.191	0.0746	0.0878	0.135	0.15	0.437	0.42	0.183	0.211	0.313	0.309	0.0905	0.0927	0.0245	0.0296	49.6	43.6	22.5	17.4	29.5	22.1	67	56.6	17.3	26.1	42.3	22.2
27		0.916	1267.56	0.361	0.864	0.265	0.00875	8.98	0.233	0.224	0.108	0.115	0.118	0.134	0.411	0.39	0.193	0.213	0.342	0.336	0.0934	0.0878	0.0232	0.0286	57.5	50.4	25.7	15.3	40.4	22.6	56.4	43.7	22.5	29.3	49.9	20.6
28		0.378	1426.27	0.381	0.897	0.282	0.0105	8.79	0.22	0.217	0.11	0.125	0.127	0.135	0.43	0.388	0.23	0.23	0.333	0.284	0.0994	0.087	0.0227	0.0191	38.3	35.5	16.8	13.6	25.3	19.1	36.3	34.2	10.3	14.8	38.1	20.1
29		0.441	1624.45	0.349	0.908	0.24	0.0108	8.69	0.175	0.209	0.0923	0.123	0.114	0.133	0.381	0.366	0.188	0.205	0.395	0.357	0.0959	0.0896	0.0252	0.0291	60.1	60.9	17.8	15.8	37.1	24.3	51.8	48.4	24.3	33.6	34.9	17.7
30		0.212	1558.31	0.382	0.962	0.263	0.012	9.55	0.179	0.201	0.0988	0.121	0.129	0.145	0.428	0.392	0.181	0.22	0.33	0.318	0.0979	0.1	0.0269	0.029	31.3	26.7	17.1	13.2	28.5	18.6	35.3	27.6	11.8	18	44.3	17.2
31		1.45	1526.03	0.353	0.877	0.261	0.0118	9.02	0.162	0.185	0.0679	0.0732	0.132	0.137	0.442	0.406	0.199	0.22	0.295	0.281	0.086	0.073	0.0212	0.0215	45	42.2	22.8	15.9	44.8	36	62.1	56.9	19.2	29	41.9	28.7
32		2.31	1466	0.36	0.93	0.261	0.00974	9.61	0.204	0.237	0.109	0.14	0.132	0.144	0.397	0.372	0.244	0.24	0.301	0.277	0.0955	0.0932	0.0236	0.0197	42.6	38.4	18.9	11.9	30.5	19.8	36.9	29	8.55	14.5	48	25.5
33		0.657	1616.68	0.368	0.881	0.257	0.00853	9.14	0.133	0.146	0.0733	0.0864	0.127	0.153	0.469	0.426	0.231	0.253	0.337	0.322	0.0955	0.0937	0.0289	0.0294	45.4	42.1	20.5	16.7	34.6	28.9	42.2	43.1	18.3	26.4	45	24.4
34		0.395	1412.24	0.397	0.938	0.288	0.0135	9.79	0.188	0.185	0.093	0.107	0.146	0.157	0.457	0.458	0.191	0.212	0.332	0.311	0.107	0.103	0.0214	0.03	53.1	44	19.7	13.7	31.4	23	58.1	48.8	18.4	28.7	32	15.3
35		1.61	1491.85	0.38	0.977	0.276	0.0104	8.84	0.222	0.217	0.121	0.126	0.141	0.147	0.424	0.391	0.188	0.203	0.292	0.281	0.0991	0.0937	0.022	0.0218	45.9	45.4	20.5	19	35.1	26.2	54.7	41.1	19.5	34.5	44.8	25.1
36		2.07	1509.82	0.386	0.995	0.279	0.0104	8.63	0.223	0.208	0.104	0.118	0.129	0.147	0.43	0.384	0.186	0.195	0.268	0.261	0.0894	0.0898	0.0198	0.0216	32.6	33.7	19.8	19.1	23.8	24.1	40.8	36.9	18	26.9	48.9	28.3
37		0.391	1262.28	0.389	0.851	0.269	0.0127	9.63	0.254	0.281	0.104	0.126	0.144	0.162	0.509	0.489	0.206	0.238	0.366	0.361	0.112	0.109	0.0249	0.0268	53.5	42.4	24	13.5	30.5	17.1	70.5	48.5	16.5	20.8	31.4	12.5
38		2.83	1538.27	0.36	0.895	0.258	0.00919	8.4	0.27	0.278	0.122	0.137	0.136	0.131	0.449	0.33	0.234	0.256	0.36	0.297	0.101	0.0828	0.0331	0.028	35.4	39.2	20.2	24.2	21.6	31.9	49	57.8	14.7	30.4	40.8	38.2
39		0.714	1533.28	0.358	0.923	0.249	0.0103	9.36	0.19	0.175	0.1	0.109	0.13	0.139	0.382	0.366	0.205	0.238	0.284	0.258	0.0842	0.0698	0.0179	0.0187	45.1	39.3	20.7	15.2	38.4	22.7	42.4	23.4	12.6	16.8	47.2	22.8
40		0.942	1404.82	0.389	1.08	0.274	0.0112	9.01	0.245	0.234	0.122	0.129	0.134	0.146	0.456	0.414	0.225	0.245	0.35	0.341	0.1	0.0831	0.0255	0.0277	45.5	42	21.3	24	30.2	19.9	44.6	36.3	12.4	22.5	38.1	18.5
41	AD_NFG	1.58	1613.13	0.353	0.916	0.249	0.0106	8.43	0.155	0.163	0.078	0.0928	0.117	0.141	0.392	0.359	0.194	0.215	0.272	0.257	0.0744	0.0768	0.0215	0.0231	44.8	44.4	32.1	21.6	38.9	29.9	55.7	55	20.4	29.4	55.6	31.7
42		0.598	1449.84	0.351	0.924	0.24	0.0104	8.29	0.2	0.191	0.0934	0.111	0.115	0.124	0.404	0.374	0.199	0.217	0.328	0.304	0.089	0.0855	0.0212	0.025	51.4	47.5	19.6	16.3	27.1	20.7	56.6	47.5	16.5	28.1	34.5	16.9
43		0.521	1230.49	0.365	0.883	0.233	0.0122	9.18	0.207	0.21	0.104	0.123	0.136	0.156	0.43	0.411	0.224	0.257	0.37	0.323	0.104	0.103	0.0236	0.0278	41.2	38.1	20.3	19.5	30.9	21.3	39.1	34.9	10.4	14.5	41.6	24.4
44		1.42	1507.74	0.357	0.818	0.235	0.0102	8	0.245	0.27	0.128	0.15	0.138	0.147	0.438	0.398	0.233	0.241	0.33	0.305	0.0917	0.0715	0.0228	0.0208	37.4	38	16.5	13.5	36.3	26.9	29.5	29.6	9.76	22.8	53.7	27.6
45		0.414	1395.74	0.365	0.99	0.28	0.0113	7.96	0.225	0.233	0.11	0.125	0.129	0.138	0.452	0.428	0.201	0.225	0.337	0.33	0.0878	0.0918	0.0238	0.0281	42	39.6	17.6	14.4	31	19.7	46	36.5	13.2	19.9	35	22.1
46		0.489	1315.57	0.396	0.887	0.324	0.0123	10.1	0.202	0.206	0.0777	0.0858	0.141	0.153	0.489	0.445	0.191	0.21	0.314	0.288	0.0997	0.0829	0.0206	0.0219	39	42	36	33.1	30.2	38.2	47.1	54.4	14.3	31.5	39.7	31.2
47		1.25	1272.41	0.401	0.919	0.289	0.0122	9.19	0.23	0.268	0.0903	0.119	0.143	0.151	0.408	0.382	0.175	0.231	0.319	0.25	0.0924	0.0861	0.02	0.0214	60.1	53.8	16.1	8.74	30.4	15.7	61.7	41.8	23.9	35.1	58.5	28.8
48		0.287	1346.07	0.357	0.975	0.293	0.0124	8.52	0.214	0.223	0.0895	0.107	0.123	0.133	0.412	0.386	0.2	0.214	0.343	0.322	0.0815	0.0858	0.0237	0.0237	46	44.8	18.1	16.2	26.4	21.8	41.4	39.4	13.1	18	43.6	24.9
49		2.23	1609.21	0.338	0.839	0.246	0.0115	8.99	0.234	0.238	0.11	0.107	0.132	0.137	0.411	0.359	0.205	0.225	0.308	0.278	0.0858	0.0717	0.0211	0.02	48.5	50.4	15.7	15.1	40.6	32.4	44.9	51.3	14	24.5	48.8	28.8
50		1.14	1372.44	0.393	0.972	0.305	0.0103	10.3	0.167	0.216	0.0905	0.12	0.124	0.147	0.415	0.403	0.193	0.235	0.298	0.299	0.0963	0.1	0.0284	0.029	50.7	44.2	25.2	19.9	43.5	26.1	52.4	38.3	11.6	18.8	62.8	32.2
51		2.16	1198.63	0.379	1.05	0.271	0.0102	9.78	0.21	0.238	0.104	0.13	0.138	0.147	0.441	0.411	0.208	0.233	0.299	0.301	0.107	0.0999	0.0241	0.0215	36.1	37.3	17.6	11.9	28.8	21.2	40.9	39.5	15.9	21.1	34	20.7
52		2.78	1469.54	0.367	0.919	0.265	0.0102	8.78	0.249	0.273	0.121	0.14	0.135	0.15	0.443	0.442	0.248	0.246	0.413	0.369	0.104	0.0943	0.0237	0.0234	41.1	37.3	20.7	16.5	30	22.9	35.4	30.7	12.9	21.3	41.6	21.7
53		0.752	1595.17	0.374	0.856	0.263	0.0103	9.02	0.156	0.177	0.0747	0.0804	0.117	0.133	0.417	0.377	0.18	0.182	0.272	0.246	0.0993	0.0893	0.0231	0.0253	44.6	48.8	40.8	33.2	41.8	44.9	88.2	96.6	20	30.2	47.1	41
54		1.4	1344.96	0.353	0.821	0.248	0.0148	8.93	0.18	0.188	0.0838	0.104	0.122	0.133	0.457	0.432	0.251	0.287	0.336	0.32	0.0889	0.0944	0.0203	0.0246	38.1	34.3	18.4	14.2	28.2	20	37.5	33.2	8.43	14.5	29.9	14.6
55		1.15	1615.14	0.363	0.93	0.254	0.00996	9.03	0.215	0.223	0.0884	0.123	0.136	0.154	0.398	0.392	0.185	0.203	0.313	0.313	0.109	0.102	0.0267	0.0328	44.8	38.2	22	14.4	36.8	28.1	45.9	40.4	20.2	24.5	50.4	20
56		0.52	1358.7	0.377	0.91	0.257	0.0118	9.21	0.204	0.227	0.124	0.142	0.152	0.17	0.537	0.503	0.22	0.23	0.347	0.34	0.0942	0.0947	0.0312	0.0306	32.7	32.3	20.4	11.5	23.8	17	40.6	31.7	14.1	20	32.1	17.9
57		0.311	1417.1	0.412	0.919	0.279	0.0123	9.71	0.202	0.21	0.108	0.13	0.144	0.155	0.502	0.467	0.179	0.197	0.37	0.348	0.104	0.099	0.029	0.0321	45.2	47.4	22.6	18.5	22.8	22	57.9	61.9	21.3	34.7	31.4	24.4
58		0.923	1230.16	0.424	1.01	0.287	0.0135	10	0.2	0.245	0.104	0.101	0.158	0.165	0.435	0.417	0.21	0.235	0.406	0.373	0.129	0.124	0.0253	0.0276	49.1	44.5	17.6	15.8	37.1	27.2	70.3	59.4	15.2	20.8	38.5	19.8
59		0.302	1596.86	0.379	0.891	0.247	0.0138	9.38	0.205	0.228	0.106	0.127	0.134	0.154	0.426	0.418	0.22	0.252	0.327	0.321	0.104	0.0959	0.0273	0.035	47.9	44.4	23.1	13.6	32.2	20.9	60.2	53.2	13.7	20.8	26.3	12.9
60		0.275	1326.03	0.371	0.874	0.265	0.0124	9.79	0.218	0.222	0.0979	0.128	0.123	0.133	0.476	0.46	0.216	0.271	0.315	0.335	0.116	0.118	0.0215	0.0279	43.9	33.8	24	16.1	29.4	16	83.8	51.3	19.8	24.8	31.8	13.7
61		0.308	1379.59	0.353	0.846	0.247	0.0126	10.6	0.245	0.225	0.115	0.133	0.136	0.144	0.447	0.398	0.186	0.207	0.288	0.293	0.0881	0.0844	0.0251	0.0268	43.2	39.1	19.9	18.4	28.2	21.2	55.7	48.2	12.6	21.5	27	18.4
62		0.55	1562.76	0.362	0.857	0.27	0.0113	9.78	0.213	0.226	0.126	0.149	0.118	0.139	0.39	0.365	0.187	0.221	0.308	0.303	0.0915	0.0859	0.0255	0.0279	49	47.5	26	15.7	28.7	22.1	53.7	47	18.4	28.6	45.7	24
63		3.61	1356.67	0.338	0.811	0.226	0.0109	8.16	0.184	0.198	0.102	0.117	0.109	0.126	0.415	0.401	0.232	0.266	0.39	0.356	0.0698	0.0854	0.0279	0.028	35	34.1	17.7	13.2	21.8	19.9	47.2	36.1	12.2	17.3	33.7	27.6
64		3.34	1231.3	0.385	0.938	0.259	0.0144	9.16	0.184	0.193	0.0913	0.0998	0.131	0.138	0.458	0.428	0.236	0.243	0.357	0.358	0.135	0.107	0.0196	0.0216	46.2	42.3	25.1	20.7	33.3	24	53.2	50.9	16.2	20.9	45.2	27.4
65		0.53	1585.78	0.399	1.06	0.254	0.0166	9.04	0.171	0.163	0.0918	0.103	0.146	0.157	0.434	0.422	0.176	0.184	0.279	0.27	0.101	0.0917	0.0212	0.022	40.6	39.6	14.3	10.4	25	22.4	40.9	38.4	15	20	38.9	18.6
66		1.39	1411.92	0.375	0.917	0.254	0.0108	9.02	0.187	0.179	0.109	0.109	0.128	0.139	0.443	0.423	0.204	0.263	0.318	0.305	0.0938	0.0961	0.0223	0.0243	40.2	38.9	21.4	20.3	33.4	31.8	47	39.3	14.2	17.1	44.2	33.2
67		1.94	1419.88	0.399	1.03	0.255	0.0129	8.55	0.234	0.249	0.102	0.133	0.142	0.16	0.473	0.438	0.236	0.261	0.356	0.372	0.104	0.104	0.0272	0.0293	37.9	33.9	19.2	15.2	30.4	20.1	37.3	32.2	15.5	21.2	34.7	20.1
68		0.769	1393.48	0.36	0.937	0.235	0.0113	9.64	0.217	0.192	0.0973	0.11	0.134	0.146	0.476	0.42	0.242	0.289	0.325	0.311	0.1	0.096	0.0181	0.0214	33.9	29.7	15.8	15.8	30	24.8	33.9	24.8	7.86	16.5	33.5	24.8
69		0.374	1317.4	0.36	0.985	0.265	0.0127	10.6	0.181	0.217	0.0885	0.0992	0.135	0.145	0.399	0.359	0.207	0.238	0.329	0.32	0.126	0.118	0.0174	0.0211	54.5	48.3	19	14.7	41.3	26	50.5	43.4	15.4	21.1	44.2	23.8
70		1.15	1560.93	0.377	0.919	0.263	0.0113	9.17	0.196	0.22	0.113	0.134	0.128	0.144	0.45	0.427	0.226	0.27	0.296	0.295	0.0969	0.0896	0.0221	0.0258	34.7	34.3	18.3	16.6	34.6	28	34.4	27.2	11.1	18.6	59.5	35
71		0.377	1223	0.36	0.902	0.255	0.0113	8.18	0.216	0.208	0.0759	0.0859	0.115	0.123	0.441	0.41	0.195	0.228	0.326	0.308	0.0789	0.0846	0.0214	0.0248	46.2	41.8	21.9	17.3	30	25	54	53	16.4	25.7	40.1	19.1
72		0.484	1297.5	0.39	1.04	0.295	0.0126	9.52	0.145	0.169	0.0926	0.109	0.123	0.138	0.451	0.418	0.216	0.24	0.361	0.324	0.102	0.0992	0.0253	0.0273	50.8	40.3	15.7	11	23.3	11.6	46.5	30.1	16.5	20.3	30.4	13.4
73		0.48	1556.24	0.351	0.856	0.264	0.0101	9.86	0.218	0.227	0.13	0.154	0.118	0.137	0.378	0.36	0.187	0.217	0.31	0.299	0.0912	0.087	0.0254	0.028	48	47.3	28.3	17.5	28.5	21.4	52.5	49.8	18.1	28.2	43.1	23.2
74		1.09	1396.94	0.411	1.13	0.304	0.0143	9.66	0.212	0.22	0.104	0.118	0.154	0.159	0.436	0.369	0.214	0.224	0.32	0.299	0.125	0.118	0.0227	0.0292	53.6	56	19.2	17.9	31.5	41.5	47.9	49.9	15.3	28.3	31.2	36.3
75		0.324	1348.44	0.375	0.957	0.264	0.0114	9.84	0.201	0.205	0.0893	0.095	0.135	0.139	0.405	0.345	0.181	0.205	0.301	0.269	0.092	0.0867	0.0241	0.0232	54	45.2	18.2	15.9	26.8	22.8	52.6	51.6	8.64	15.9	39.1	20.7
76		0.377	1329.08	0.374	0.898	0.268	0.0118	9.36	0.207	0.221	0.0995	0.12	0.126	0.142	0.446	0.428	0.18	0.195	0.297	0.285	0.0942	0.0847	0.0216	0.0226	51.9	56.5	15	13.5	30.7	20.9	52.6	55.6	17.8	27.8	29.5	19
77		0.25	1430.72	0.34	0.95	0.236	0.0119	9.49	0.172	0.201	0.0903	0.121	0.136	0.146	0.43	0.415	0.21	0.211	0.32	0.3	0.101	0.0906	0.0238	0.0295	35.5	33.2	14	8.97	20.6	15.1	42.8	35.7	6.36	11.1	19.8	8.79
78		0.754	1355.26	0.422	0.955	0.271	0.0147	9.52	0.225	0.245	0.103	0.133	0.157	0.171	0.464	0.433	0.219	0.239	0.32	0.313	0.113	0.104	0.0211	0.0235	40.9	35.5	14.8	12	24.9	18.5	43.6	36.9	12.1	16.7	34.7	16.9
79		0.45	1409.69	0.365	0.938	0.264	0.0135	8.69	0.22	0.229	0.107	0.13	0.135	0.144	0.404	0.393	0.195	0.238	0.285	0.298	0.0946	0.0953	0.017	0.0222	47.1	40.2	19.8	16.1	31	20.9	54.6	41.7	12.5	20.9	38.8	15.6
80		0.782	1319.87	0.356	0.914	0.26	0.0104	8.97	0.163	0.174	0.0812	0.0962	0.121	0.143	0.392	0.366	0.209	0.233	0.368	0.333	0.0961	0.0835	0.0219	0.0241	38	37.7	21.2	21.3	39.3	37.2	38.5	43.3	12.1	18.1	40.3	28.5
81		0.313	1569.97	0.359	0.801	0.271	0.0102	8.66	0.181	0.219	0.103	0.135	0.122	0.141	0.387	0.381	0.169	0.21	0.322	0.333	0.0857	0.0827	0.0284	0.0304	50.5	38.9	20	12.3	39.8	20.2	53.8	45.2	13.7	20.3	49.8	17.2
82		0.436	1247.47	0.374	0.883	0.279	0.0104	10.2	0.204	0.24	0.112	0.14	0.137	0.149	0.441	0.417	0.237	0.268	0.344	0.322	0.0838	0.0877	0.0243	0.0253	50.3	39.5	16.2	14.3	24.5	16.5	55.3	42.1	14.5	23.1	31.6	14.8
83		0.683	1309.11	0.409	1.06	0.283	0.0139	8.97	0.198	0.196	0.109	0.12	0.139	0.163	0.489	0.452	0.213	0.237	0.294	0.3	0.089	0.0866	0.0253	0.0292	32.1	32.3	19.8	14.7	29	22.2	37.5	33.8	16	25.1	48.8	32.8
84		0.681	1502.82	0.355	0.849	0.246	0.0111	8.3	0.227	0.231	0.121	0.138	0.124	0.128	0.394	0.357	0.193	0.219	0.34	0.325	0.0902	0.0944	0.0235	0.0262	34.4	35.3	19.4	15	28.8	19.7	40.7	37	13.9	20.1	45.5	24.8
85		0.811	1451.52	0.341	0.866	0.243	0.011	9.05	0.194	0.224	0.0849	0.113	0.116	0.132	0.358	0.347	0.15	0.209	0.226	0.249	0.0739	0.07	0.0189	0.022	53.8	44.8	19.1	16.1	38.2	29.2	65.9	51	17.5	22.9	61.4	30.5
